# Supplementary material
Source: Springer Nature journal article supplement (https://www.springermedizin.de/resource/supplementary/12879_2013_3137_MOESM4_ESM.pdf/9446064)

CDI incidence per 10,000 patients bed days

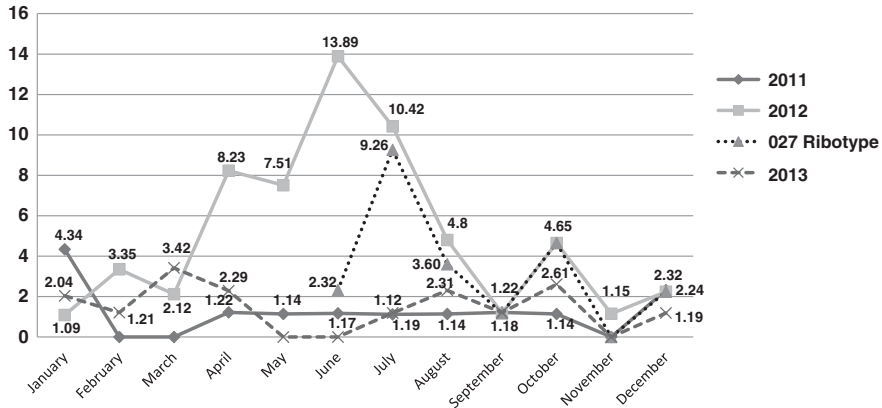

Supplement: MOESM4 [file 9446064]
